# Supplementary material
Source: publisher figshare collection journal article supplement (https://gsajournals.figshare.com/articles/dataset/_/9252530)

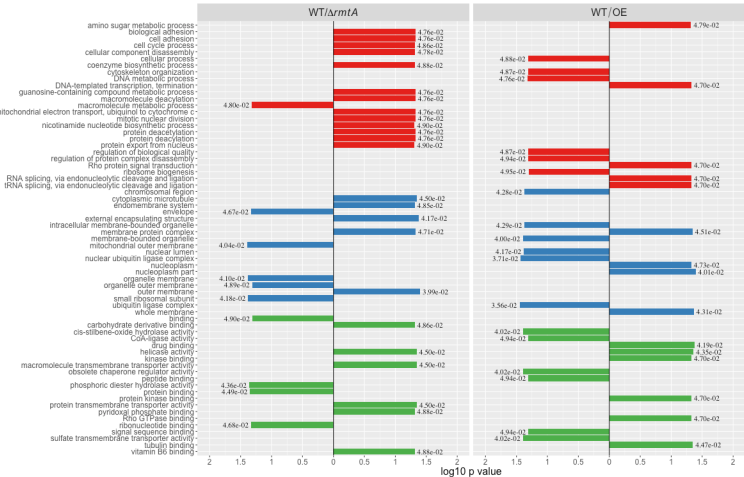

Supplement: Supplementary file 1 [file 1]

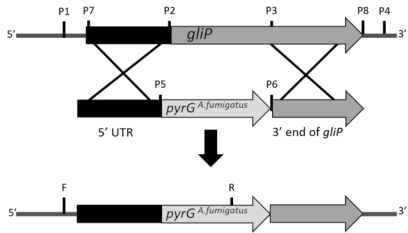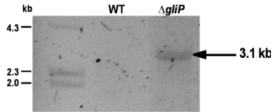

Supplement: Supplementary file 2 [file 1]

**A**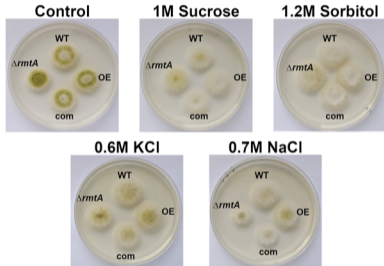**B**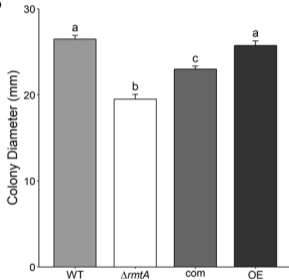

Supplement: Supplementary file 3 [file 1]

25 °C

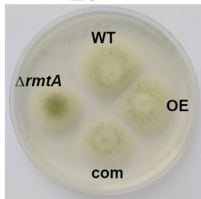

28 °C

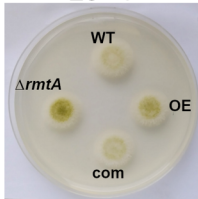

30 °C

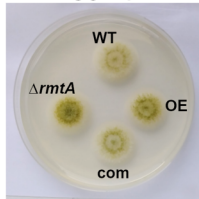

37 °C

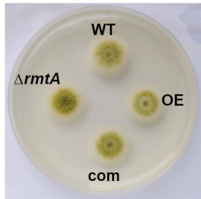

40 °C

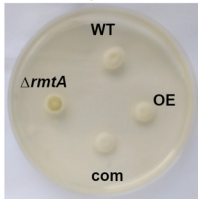

42 °C

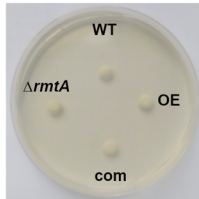

Supplement: Supplementary file 4 [file 1]
